# Supplementary material for: Photothermal-assisted antibacterial application of graphene oxide-Ag nanocomposites against clinically isolated multi-drug resistant Escherichia coli
Source: PubMed Central journal article supplement (PMC7428222; doi:10.1098/rsos.192019), 2020-07-22

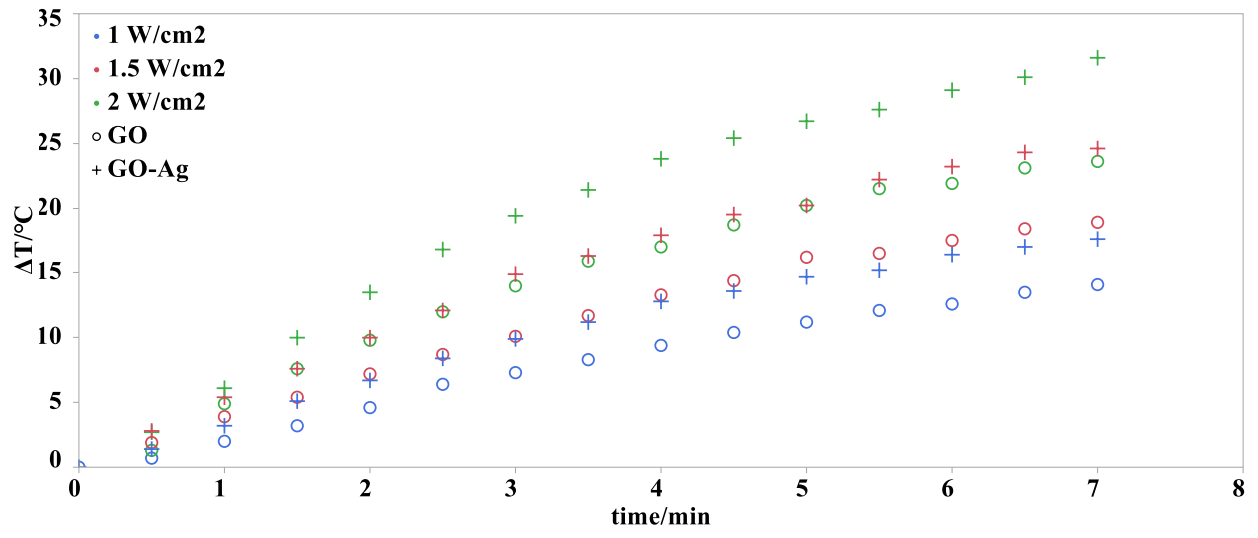

Supplement: rsos192019supp4.pdf [file rsos192019supp4.pdf]
